# Supplementary material for: A Fish Galectin-8 Possesses Direct Bactericidal Activity
Source: MDPI journal article supplement (doi:10.3390/ijms22010376), 2020-12-31

## Supplementary data

**Table S1.** Primers used in the present study.

| Primer           | Sequence (5'-3')                    |
|------------------|-------------------------------------|
| CsGal-8 F1       | AGCAGTGACATCGCTCTTCACC              |
| CsGal-8 R1       | ATTCACAGCCACTCCGTAAGTGC             |
| $\beta$ -actin F | GCACGGTATTGTGACCAACTGG              |
| $\beta$ -actin R | CAGGGGAGCCTCTGTGAGC                 |
| RPL18 F          | GAACCCTACCCCTCCTCTGT                |
| RPL18 R          | TACGAGAGTCGTAACGCAGC                |
| CsGal-8 F2       | ATGCTAGTGTCACGTACAAGGCAG            |
| CsGal-8 R2       | TCAGTGGAGTTTTACATCCAGCAGTG          |
| CsGal-8 F3       | GGAATTCCATATGCTAGTGTCACGTACAAGGCAG  |
| CsGal-8 R3       | CCGCTCGAGTCAGTGGAGTTTTACATCCAGCAGTG |
| CsGal-8-N F      | GGAATTCCATATGATGGGTGGTTTGCTTCCC     |
| CsGal-8-N R      | CCGCTCGAGTCCAGAGATGAGTATTGTGTCAACA  |
| CsGal-8-C F      | GGAATTCCATATGATGGGACTGAGAGTCGGACA   |
| CsGal-8-C R      | CCGCTCGAGTTTTACATCCAGCAGTGAGACATC   |
| CsGal-8 F4       | CTAGCTAGCATGCTAGTGTCACGTACAAGGCAG   |
| CsGal-8 R4       | CCGCTCGAGGTGGAGTTTTACATCCAGCAGTGAGA |

**Figure S1.** Phylogenetic analysis of CsGal-8. The phylogenetic tree was constructed with the neighbor-joining algorithm. CsGal-8 is marked with an asterisk.

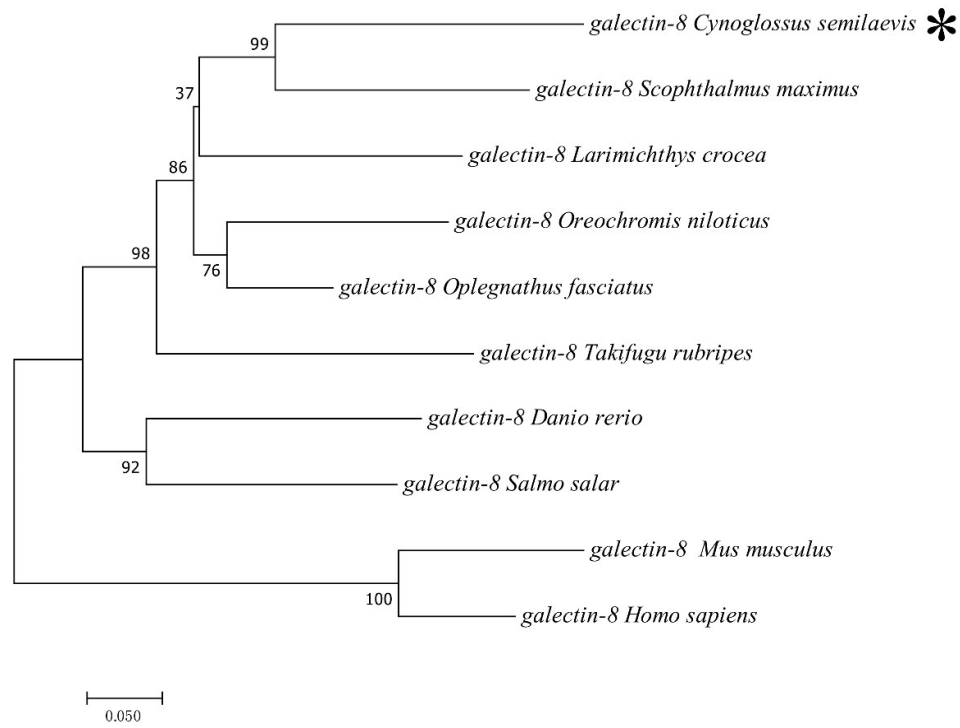

**Figure S2.** Three-dimensional structure of CsGal-8 modeled using the SWISS-MODEL prediction algorithm based on human Gal-8.

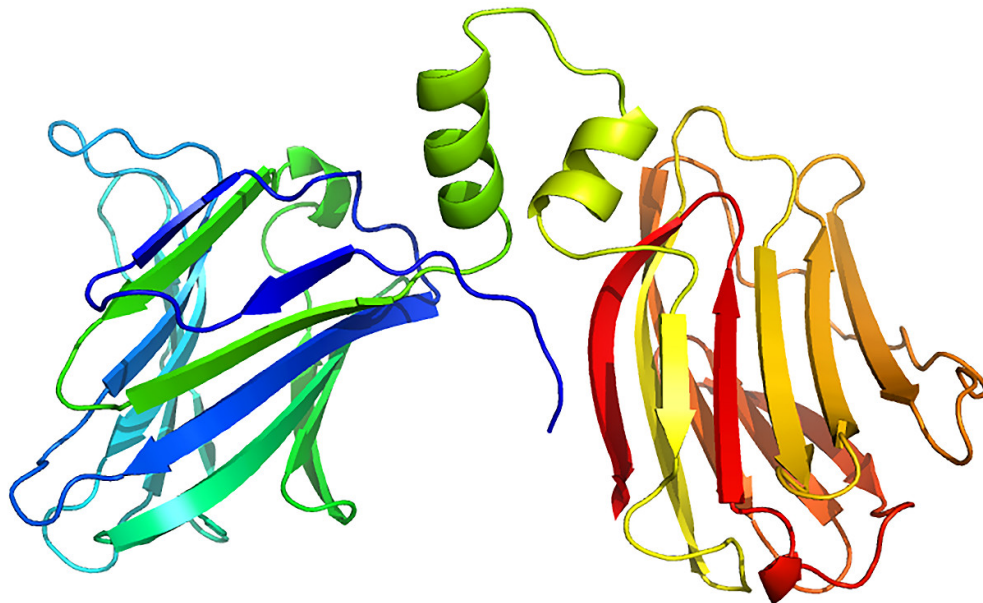

**Figure S3.** SDS-PAGE analysis of recombinant CsGal-8 (rCsGal-8). rCsGal-8 was expressed in *E. coli* and purified by Ni-NTA affinity chromatography. The total proteins, the Flow-through portion, and the purified rCsGal-8 were subjected to SDS-PAGE and stained with Coomassie brilliant blue R250 after electrophoresis.

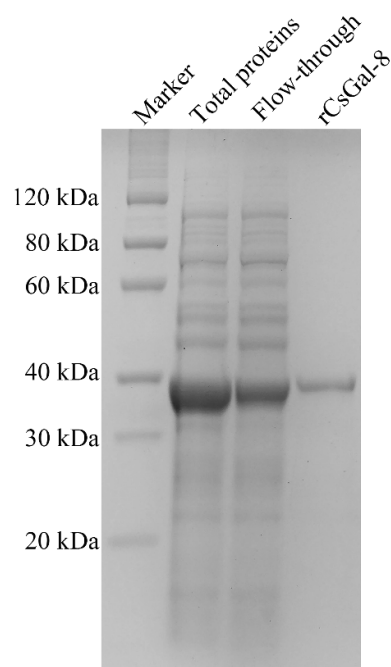

**Figure S4.** The effects of rCsGal-8-N and rCsGal-8-C on *Vibrio anguillarum* viability. *V. anguillarum* was incubated with or without (control) 1  $\mu$ M rCsGal-8, rCsGal-8-N, or rCsGal-8-C for 1 h. The number of surviving bacteria was counted and shown as colony-forming unit (CFU). Values are the means of three experimental replicates and shown as means  $\pm$  S.D.. \*\* $p < 0.01$ .

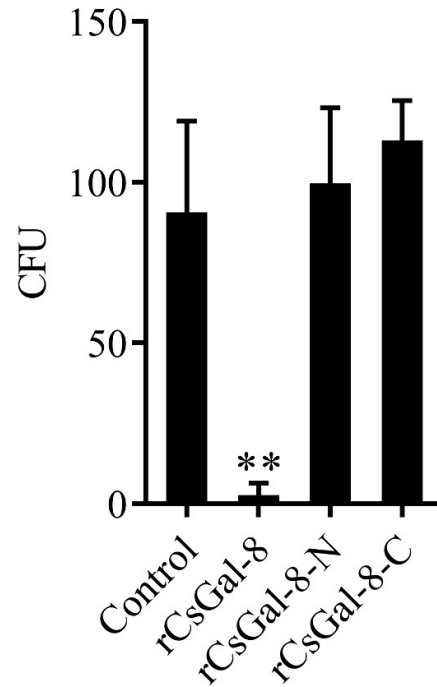

Supplement: s1 [file s1]
